# Supplementary material for: Hyaluronic Acid-Binding, Anionic, Nanoparticles Inhibit ECM Degradation and Restore Compressive Stiffness in Aggrecan-Depleted Articular Cartilage Explants
Source: MDPI journal article supplement (doi:10.3390/pharmaceutics13091503), 2021-09-18
Supplement: s1 [file s1]

Supplementary Material

# Hyaluronic Acid-Binding, Anionic, Nanoparticles Inhibit ECM Degradation and Restore Compressive Stiffness in Aggrecan-Depleted Articular Cartilage Explants

Marcus Deloney<sup>1</sup>, Parssa Garoosi<sup>1</sup>, Vanessa F.C.Dartora<sup>1,2</sup>, Blaine A.Christiansen<sup>3</sup> and Alyssa Panitch<sup>1,2,\*</sup>

<sup>1</sup> Biomedical Engineering Department, 451 E. Health Sciences Dr. Room 2303, University of California Davis, Davis, CA 95616, USA; madeloney@ucdavis.edu (M.D.); pdgaroosi@ucdavis.edu (P.G.); vfcdartora@ucdavis.edu (V.F.C.D.)

<sup>2</sup> Department of Surgery, School of Medicine, University of California Davis, Sacramento, CA 95817, USA

<sup>3</sup> Lawrence J. Ellison Musculoskeletal Research Center, Department of Orthopedic Surgery, University of California Davis Health, 4635 2nd Avenue, Suite 2000, Sacramento, CA 95817, USA; bchristiansen@ucdavis.edu

\* Correspondence: apanitch@ucdavis.edu; Tel.: +1-530-754-3222

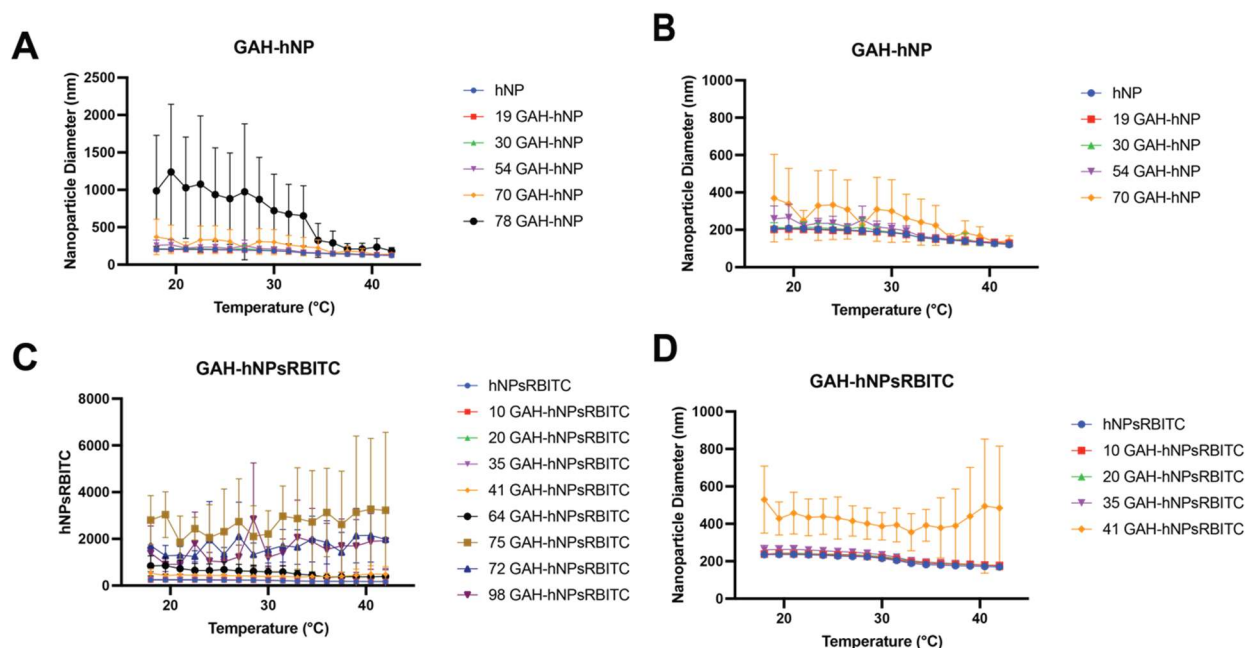

**Figure S1.** Increasing peptide concentration on the surface of hNP and hNPsRBITC significantly increases the variation in nanoparticle diameter. (A) hNP conjugated with 19–78 GAH peptides; (B) hNP conjugated with 19–70 GAH peptides; (C) hNPsRBITC conjugated with 10–98 GAH peptides; (D) hNPsRBITC conjugated with 10–41 peptides

**Table S1.** GAH-hNP diameter, PDI and Zeta-Potential at increasing GAH concentration on the surface of hNP.

| GAH:hNP<br>Conjugation    | Diameter<br>18 °C (nm) | Diameter<br>42 °C (nm) | Zeta Potential<br>18 °C (mV) | Zeta Potential<br>42 °C (mV) | PDI<br>18 °C | PDI<br>42 °C |
|---------------------------|------------------------|------------------------|------------------------------|------------------------------|--------------|--------------|
| 0:1<br>(hNP)              | 205.20 ± 8.83          | 121.57 ± 6.71          | -24.93 ± 2.53                | -30.22 ± 1.65                | 0.13 ± 0.03  | 0.11 ± 0.03  |
| 0.5:1<br>(19 GAH-<br>hNP) | 202.46 ± 14.69         | 128.67 ± 11.34         | -9.89 ± 1.66                 | -12.89 ± 1.87                | 0.11 ± 0.0   | 0.09 ± 0.02  |
| 1:1<br>(30 GAH-<br>hNP)   | 213.43 ± 24.12         | 125.54 ± 10.03         | -9.85 ± 2.82                 | -14.03 ± 1.08                | 0.17 ± 0.09  | 0.14 ± 0.06  |
| 2:1<br>(54 GAH-<br>hNP)   | 258.99 ± 69.16         | 126.60 ± 12.27         | -13.99 ± 2.04                | -17.13 ± 2.15                | 0.25 ± 0.14  | 0.18 ± 0.05  |
| 4:1<br>(70 GAH-<br>hNP)   | 369.84 ±<br>234.59     | 140.57 ± 27.98         | -11.74 ± 2.77                | -13.87 ± 2.40                | 0.34 ± 0.30  | 0.23 ± 0.15  |
| 6:1<br>(78 GAH-<br>hNP)   | 986.36 ±<br>741.27     | 182.38 ± 45.18         | -8.61 ± 4.03                 | -11.89 ± 3.39                | 0.52 ± 0.29  | 0.30 ± 0.07  |

**Table S2.** GAH-hNPsRBITC diameter, PDI, and Zeta-Potential at increasing GAH concentration on the surface of hNPsR-BITC.

| <b>GAH:<br/>hNPsRBITC<br/>Conjugation</b> | <b>Diameter<br/>18 °C (nm)</b> | <b>Diameter<br/>42 °C (nm)</b> | <b>Zeta<br/>Potential<br/>18 °C (mV)</b> | <b>Zeta<br/>Potential<br/>42 °C (mV)</b> | <b>PDI<br/>18 °C</b> | <b>PDI<br/>42 °C</b> |
|-------------------------------------------|--------------------------------|--------------------------------|------------------------------------------|------------------------------------------|----------------------|----------------------|
| 0:1<br>(hNPsRBITC)                        | 235.75 ± 3.63                  | 169.60 ± 3.96                  | -21.41 ± 1.26                            | -35.11 ± 0.77                            | 0.04 ± 0.02          | 0.06 ± 0.02          |
| 0.5:1<br>(10 GAH-<br>hNPsRBITC)           | 238.73 ± 5.33                  | 177.31 ± 5.99                  | -8.94 ± 1.92                             | -12.01 ± 2.46                            | 0.07 ± 0.03          | 0.08 ± 0.02          |
| 1:1<br>(20 GAH-<br>hNPsRBITC)             | 238.25 ± 8.37                  | 177.52 ± 5.44                  | -8.69 ± 3.06                             | -10.44 ± 1.23                            | 0.11 ± 0.08          | 0.09 ± 0.05          |
| 2:1<br>(35 GAH-<br>hNPsRBITC)             | 261.41 ± 24.73                 | 175.80 ± 1.69                  | -7.90 ± 1.43                             | -10.71 ± 2.57                            | 0.13 ± 0.06          | 0.12 ± 0.06          |
| 4:1<br>(41 GAH-<br>hNPsRBITC)             | 529.92 ± 179.26                | 484.56 ± 330.96                | -8.75 ± 1.64                             | -14.33 ± 0.94                            | 0.49 ± 0.22          | 0.40 ± 0.15          |
| 6:1<br>(64 GAH-<br>hNPsRBITC)             | 844.35 ± 424.90                | 393.14 ± 25.43                 | -8.45 ± 2.53                             | -16.33 ± 2.85                            | 0.53 ± 0.15          | 0.48 ± 0.12          |
| 8:1<br>(75 GAH-<br>hNPsRBITC)             | 2801.00 ± 1047.58              | 3223.51 ± 3341.12              | -8.18 ± 2.91                             | -11.57 ± 3.41                            | 0.44 ± 0.08          | 0.83 ± 0.14          |
| 10:1<br>(72 GAH-<br>hNPsRBITC)            | 1709.23 ± 1112.62              | 1975.47 ± 1246.46              | -5.44 ± 1.78                             | -9.31 ± 3.75                             | 0.72 ± 0.26          | 0.79 ± 0.21          |
| 12:1<br>(98 GAH-<br>hNPsRBITC)            | 1394.99 ± 1151.76              | 1926.57 ± 1254.16              | -8.31 ± 5.81                             | -11.37 ± 7.59                            | 0.77 ± 0.22          | 0.70 ± 0.22          |

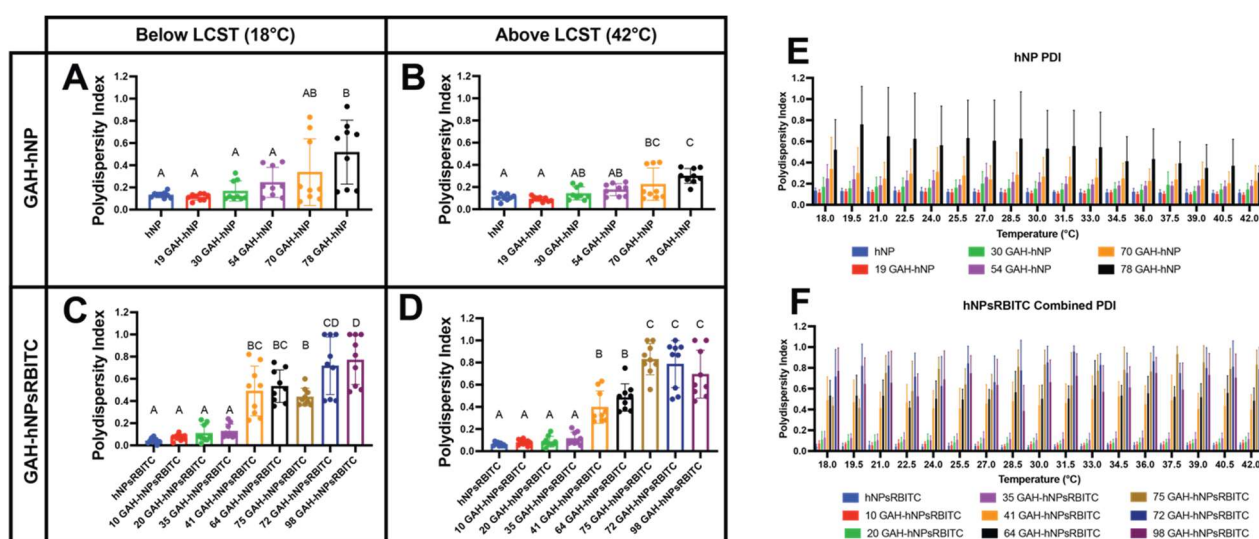

**Figure S2** Increasing GAH concentration on the surface of hNP and hNPsRBITC increasing polydispersity of particles in solution. Direct values listed in Supplemental Tables 1 and 2. (A) Zeta potential of hNP conjugated with 19–78 peptides at 18 °C; (B) zeta potential of hNP conjugated with 19–78 peptides at 42 °C; (C) zeta potential of hNPsRBITC conjugated with 10–98 peptides at 18 °C; (D) zeta potential of hNPsRBITC conjugated with 10–98 peptides at 42 °C; (E) zeta potential of hNP conjugated with 19–78 peptides at 18 °C–42 °C; (F) zeta potential of hNPsRBITC conjugated with 10–98 peptides at 18 °C–42 °C;

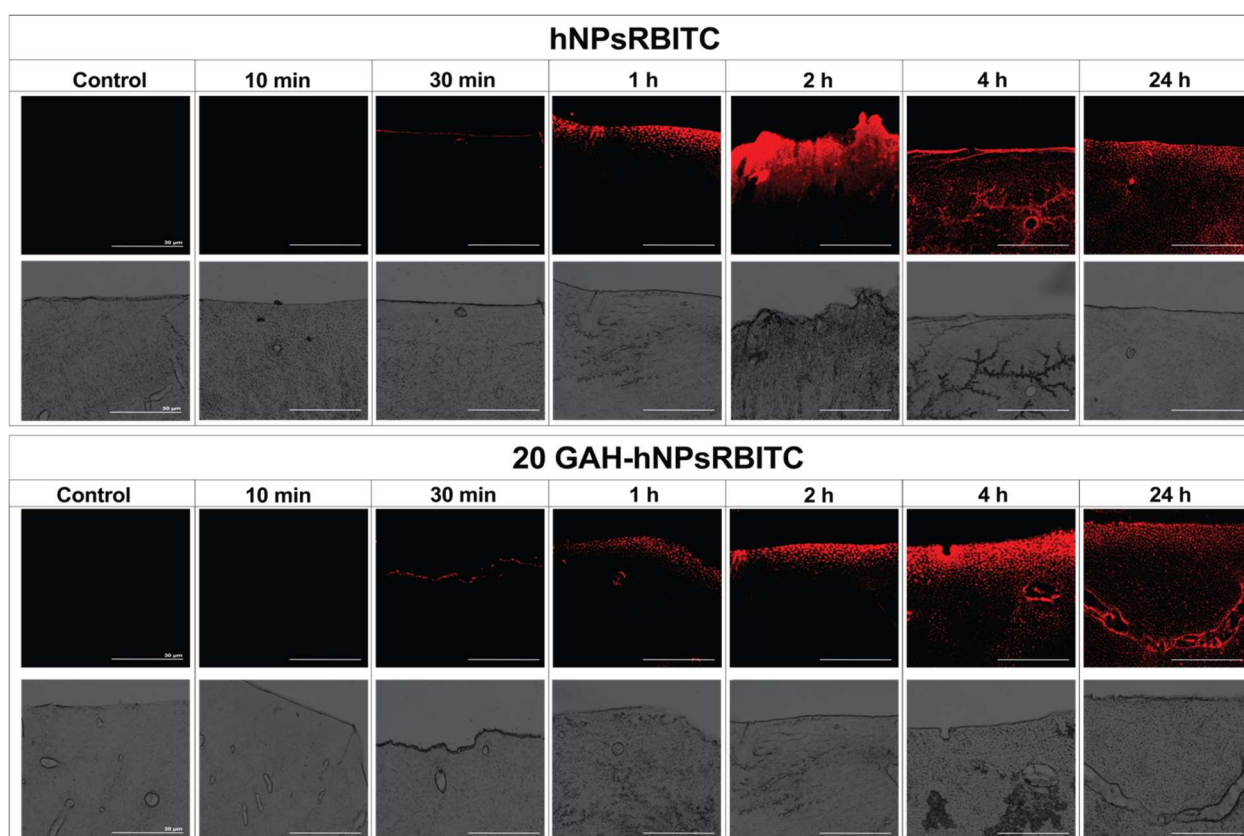

**Figure S3.** Timed diffusion of 20 GAH-hNPsRBITC into AD cartilage explants.

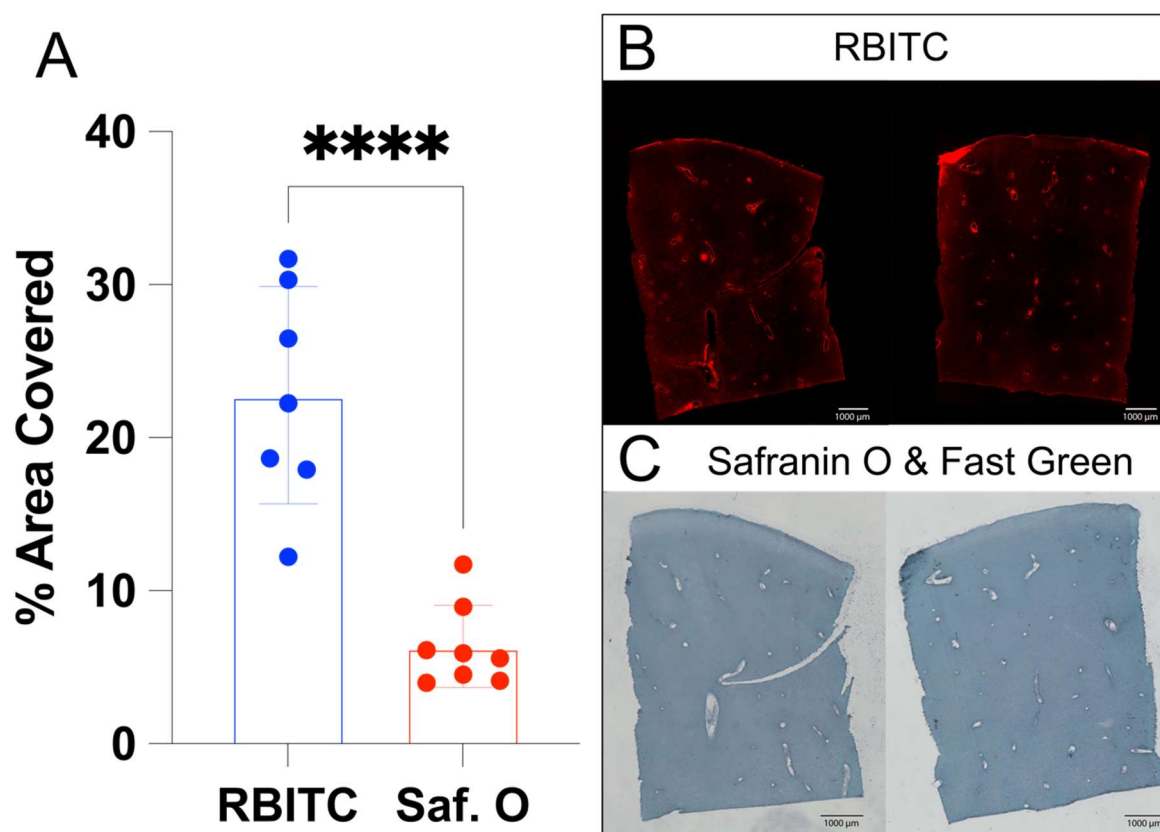

**Figure S4.** Aggrecan-depleted explants treated with 0.10 mg unconjugated hNPsRBITC, frozen in OCT, and sectioned. The explants were quantified for hNPsRBITC and Safranin O and Fast Green (**A**). Example explants are shown in (**B**) hNPsRBITC and (**C**) Safranin O and Fast Green that were assessed to determine whether the sulfated AMPs within the hNPsRBITC were stained as well. The Safranin O and Fast Green stain does not stain the hNPsRBITC. Scale bars are 1000  $\mu\text{m}$ .  $p < 0.0001$  represented by \*\*\*\*.

### Standard Curve of CS and hNP using DMMB

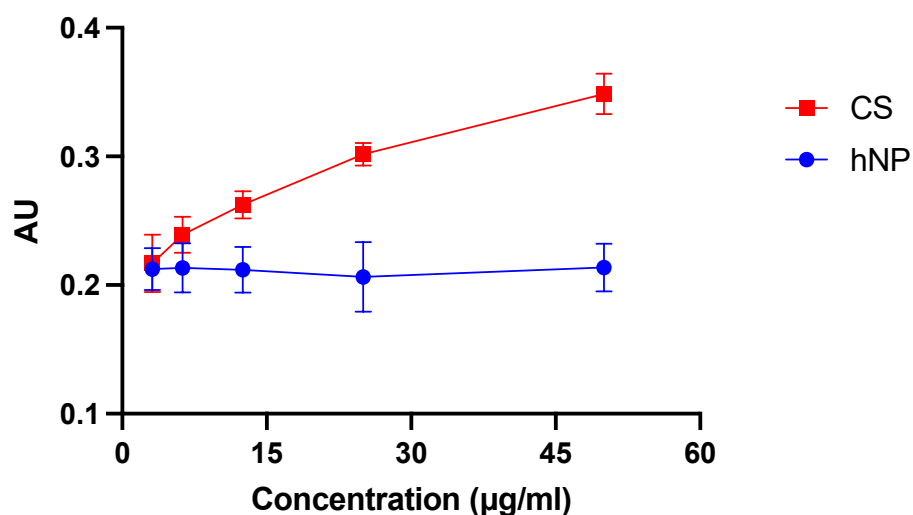

**Figure S5.** Standard curves of chondroitin sulfate (CS) (red) and hNP (blue) using DMMB assay. CS SC:  $y = 0.0028x + 0.2171$   $R^2 = 0.9661$ ; hNP SC:  $0.0002x + 0.2106$   $R^2 = 0.7512$ .
